# Supplementary material for: Centrosomal organization of Cep152 provides flexibility in Plk4 and procentriole positioning
Source: PubMed Central journal article supplement (PMC10501443; doi:10.1083/jcb.202301092), 2023-09-14
Supplement: JCB_202301092_SourceDataF1.pdf [file JCB_202301092_SourceDataF1.pdf]

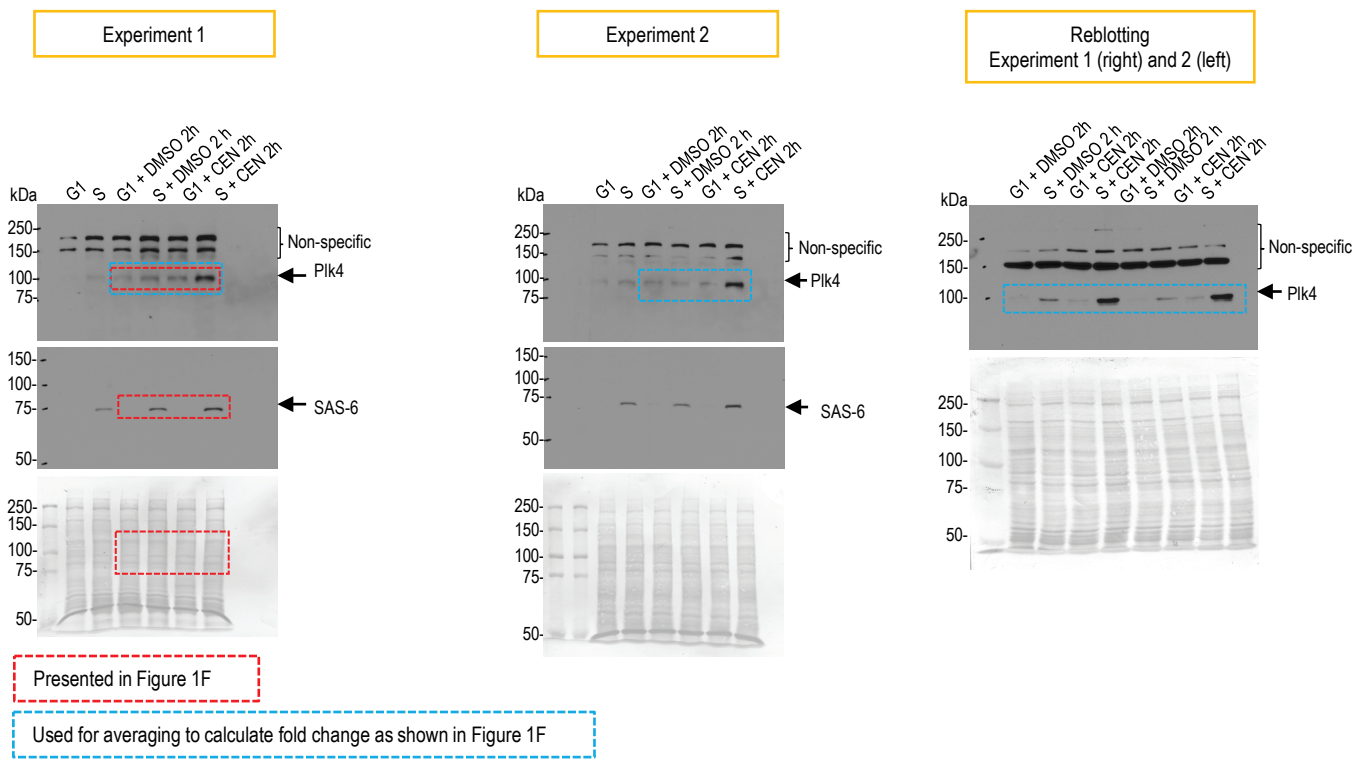

**Source data for Plk4 in Figure 1E.** Uncropped immunoblots and corresponding membranes stained with Ponceau after immunoblotting. G1 or S HeLa<sup>C1-GFP</sup> cells were treated with DMSO or centrinone (CEN) for 2 h and total cell lysate was probed with mouse anti-Plk4 and subsequently mouse anti-SAS-6 antibodies. Red boxes indicate the cropped regions presented in Figure 1E. Blue boxes indicate bands used for averaging and calculation of fold change shown in Figure 1E.

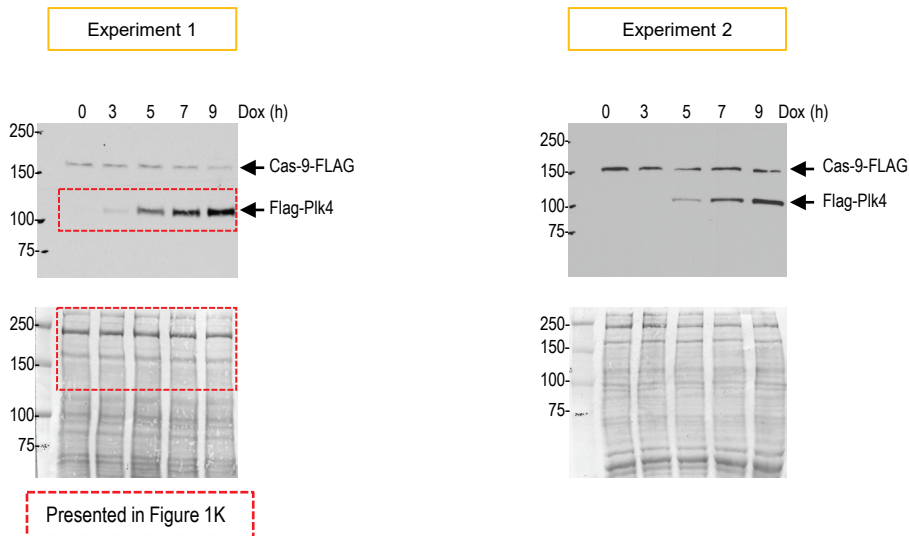

**Source data for Figure 1J.** Uncropped immunoblots and corresponding membranes stained with Ponceau after immunoblotting. S phase arrested RPE-1<sup>Plk4</sup> were treated with doxycycline (Dox) to induce expression of FLAG-PIK4. Levels of FLAG-PIK4 after 3, 5, 7, and 9 h of doxycycline exposure were detected from total cell lysates using an anti-FLAG antibody. Red boxes indicate the cropped regions of presented in Figure 1J
